# Supplementary material for: Factors Affecting Farmers’ Use of Inorganic Fertilizers and Manure in South Asia
Source: Research Square preprint supplement (doi:10.21203/rs.3.rs-206349/v1), 2021-02-22
Supplement: Supplementary file 1 [file 9246afaefec1c5a3d77c81d1.docx]

**Appendix**

**Table A1: Average N fertilizer applied in rice (in kg ha-1)**

| Study sites | Urea  (A) | DAP  (B) | Manure | | Total N | |
| --- | --- | --- | --- | --- | --- | --- |
| 0.5%N (C) | 2%N (D) | A+B+C | A+B+D |
| Haryana | 144.9 | 23 | 9.51 | 37.98 | 177.4 | 205.88 |
| Bihar | 96.6 | 17.1 | 4.625 | 18.5 | 118.3 | 132.2 |
| Nepal | 94.3 | 11.6 | 6.81 | 27.24 | 112.3 | 133.14 |
| Bangladesh | 131.1 | 11.7 | 5.6 | 22.4 | 148.4 | 165.2 |

**Table A2: Average N fertilizer applied in wheat (in kg ha-1)**

| Study sites | Urea (A) | DAP  (B) | Manure | | Total N | |
| --- | --- | --- | --- | --- | --- | --- |
| 0.5%N (C) | 2%N (D) | A+B+C | A+B+D |
| Haryana | 147.2 | 22.5 | 8.4 | 33.6 | 178.1 | 203.3 |
| Bihar | 103.5 | 19.8 | 6.25 | 25 | 129.6 | 148.3 |
| Nepal | 96.6 | 14.22 | 5.15 | 20.6 | 115.9 | 131.4 |

**Table A3: Factors influencing the over-use of N from inorganic fertilzer only (kg ha-1) in rice and wheat**

| Variables | Rice | Wheat |
| --- | --- | --- |
| *Household (HH) characteristics* |  |  |
| Male headed HH | 0.34* | 0.41** |
|  | (0.18) | (0.17) |
| Age of HH head | 0.01 | 0.00 |
|  | (0.03) | (0.00) |
| Primary education (base category: illiterate) | 0.06 | 0.09 |
|  | (0.13) | (0.11) |
| Secondary education (base category: illiterate) | 0.09*** | 0.17** |
|  | (0.02) | (0.09) |
| Higher education (base category: illiterate) | 0.22** | 0.18** |
|  | (0.10) | (0.08) |
| Family size (AEC) | 0.32 | 0.29 |
|  | (0.38) | (0.31) |
| Migration | 0.07 | 0.10 |
|  | (0.08) | (0.11) |
| *Economic and social capital* |  |  |
| Land size | 0.31*** | 0.42*** |
|  | (0.14) | (0.09) |
| Livestock owned | -0.15*** | -0.12*** |
|  | (0.03) | (0.04) |
| Asset index | 0.13*** | 0.11** |
|  | (0.04) | (0.5) |
| Credit access | -0.12 | -0.09 |
|  | (0.08) | (0.13) |
| Off-farm income | 0.09*** | 0.06*** |
|  | (0.03) | (0.02) |
| Membership | 0.01 | 0.11** |
|  | (0.01) | (0.05) |
| *Access to market, extension service and training* |  |  |
| Distance to input market | -0.16*** | -0.19*** |
|  | (0.05) | (0.03) |
| Distance to extension service | 0.05 | 0.10 |
|  | (0.07) | (0.13) |
| Training on fertilizer management | -0.07*** | -0.09*** |
|  | (0.02) | (0.03) |
| *Farm land characteristics* |  |  |
| Soil fertility | -0.08*** | -0.07*** |
|  | (0.03) | (0.02) |
| Soil depth | -0.12** | -0.15*** |
|  | (0.05) | (0.03) |
| Land slope | -0.15 | 0.12 |
|  | (0.12) | (0.16) |
| Irrigation | 0.52*** | 0.59*** |
|  | (0.15) | (0.14) |
| Soil salinity | -0.10 | -0.11 |
|  | (0.08) | (0.12) |
| Land ownership | 0.21*** | 0.18*** |
|  | (0.05) | (0.06) |
| Distance to plot | -0.11*** | -0.07*** |
|  | (0.03) | (0.02) |
| *Study locations dummy* |  |  |
| Haryana (base category: Nepal) | 0.43*** | 0.37*** |
|  | (0.11) | (0.13) |
| Bihar (base category: Nepal) | 0.21*** | 0.24*** |
|  | (0.07) | (0.06) |
| Bangladesh (base category: Nepal) | 0.29*** | na |
|  | (0.11 | na |
| Constant | -2.09*** | -1.85*** |
|  | (0.67) | (0.58) |
| LR chi (26) | 161.21 | 183.63 |
| Prob > chi2 | 0.000 | 0.000 |
| Pseudo R-Squared | 0.21 | 0.17 |
| Censored observations | 3777 | 2675 |
| Uncensored observations | 937 | 513 |
| Total number of observations | 4712 | 3188 |

Note: Standard errors in parenthesis. *, **, and ** refer to 10%, 5%, and 1% level of significance, respectively. 'na’ refers to not applicable.
